# Supplementary material for: Cancer-associated fibroblasts induce epithelial–mesenchymal transition of bladder cancer cells through paracrine IL-6 signalling
Source: PubMed Central journal article supplement (PMC6371428; doi:10.1186/s12885-019-5353-6), 2019-02-11
Supplement: 12885_2019_5353_MOESM2_ESM.pdf [file 12885_2019_5353_MOESM2_ESM.pdf]

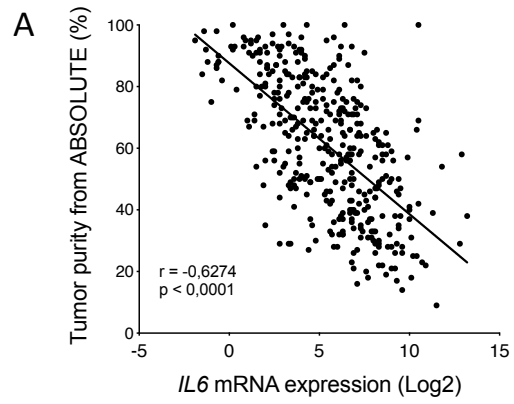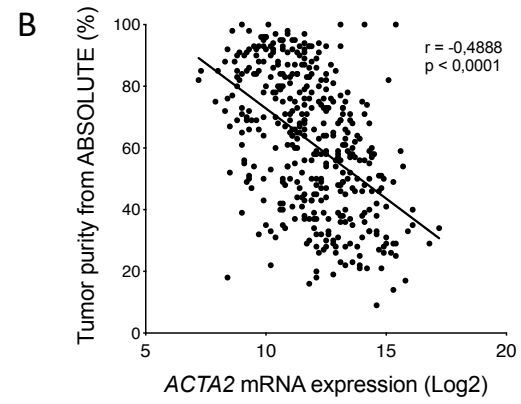

**Additional file 2.** Correlation of tumor purity scores obtained by using the ABSOLUTE algorithm with mean *IL6* (**A**) and *ACTA2* (**B**) expression.
